# Supplementary material for: Functional Analysis Identifies Damaging CHEK2 Missense Variants Associated with Increased Cancer Risk
Source: Oxford University Press journal article supplement (doi:10.1158/0008-5472.can-21-1845), 2021-12-13
Supplement: can-21-1845_supplementary_table_s2_supps2.xlsx [file can-21-1845_supplementary_table_s2_supps2.xlsx]

## Sheet: Sheet1
Supplementary Table S2
List of human CHEK2 missense VUS analyzed in this study and their predicted splice effects using Alamut and SpliceAI. Alamut includes predictions from four algorithms (SpliceSiteFinder-like, MaxEntScan, GeneSplicer and NNSPLICE). SpliceAI scores range from 0-1 and can be interpreted as the probability that the variant affects splicing at any position within a window of +/- 50 bp. For each variant…
Genomic location (on Assembly GRCh37)	Protein variant	Exon location	Splice predictions in Alamut				SpliceAI score				SpliceAI pre-mRNA position
			SpliceSiteFinder-like	MaxEntScan	NNSPLICE	GeneSplicer	Acceptor Loss	Donor Loss	Acceptor Gain	Donor Gain	Acceptor Loss	Donor Loss	Acceptor Gain	Donor Gain
chr22_29130661_C_A	Ala17Ser	Exon 2	No effect	No effect	Introduction of weak acceptor splice site	No effect	0	0	0.01	0	n/a	n/a	-12 bp	n/a
chr22_29130520_C_T	Glu64Lys	Exon 2	No effect	No effect	No effect	No effect	0	0	0	0	n/a	n/a	n/a	n/a
chr22_29121326_T_C	Arg117Gly	Exon 3	No effect	No effect	No effect	No effect	0	0	0	0	n/a	n/a	n/a	n/a
chr22_29121301_A_G	Phe125Ser	Exon 3	No effect	No effect	No effect	No effect	0	0	0	0	n/a	n/a	n/a	n/a
chr22_29121256_C_T	Ser140Gln	Exon 3	No effect	No effect	No effect	No effect	0	0	0	0	n/a	n/a	n/a	n/a
chr22_29121253_T_G	Lys141Thr	Exon 3	No effect	No effect	No effect	No effect	0	0	0	0.01	n/a	n/a	n/a	-26 bp
chr22_29121242_G_A	Arg145Trp	Exon 3	No effect	No effect	No effect	No effect	0	0.01	0	0	n/a	-15 bp	n/a	n/a
chr22_29121087_A_G	Ile157Thr	Exon 4	No effect	No effect	No effect	No effect	0	0	0.01	0	n/a	n/a	21 bp	n/a
chr22_29121087_A_C	Ile157Ser	Exon 4	No effect	Introduction of weak acceptor splice site	No effect	No effect	0	0	0	0	n/a	n/a	n/a	n/a
chr22_29121078_A_G	Ile160Thr	Exon 4	Introduction of weak acceptor splice site	No effect	No effect	No effect	0	0	0.02	0	n/a	n/a	-3 bp	n/a
chr22_29121072_T_C	Asp162Gly	Exon 4	Introduction of weak donor splice site	No effect	No effect	No effect	0.05	0	0	0	36 bp	n/a	n/a	n/a
chr22_29121058_C_T	Gly167Arg		No effect	No effect	No effect	No effect	0.06	0	0	0	50 bp	n/a	n/a	n/a
chr22_29121050_A_C	Phe169Leu	Exon 4	Introduction of weak donor splice site	Introduction of weak donor splice site	Introduction of weak donor splice site	No effect	0	0	0	0.08	n/a	n/a	n/a	0 bp
chr22_29121019_G_A	Arg180Cys	Exon 4	No effect	No effect	No effect	No effect	0	0	0	0	n/a	n/a	n/a	n/a
chr22_29121015_C_T	Arg181His	Exon 4	No effect	No effect	No effect	No effect	0	0	0	0	n/a	n/a	n/a	n/a
chr22_29121001_T_G	Asn186His	Exon 4	No effect	No effect	No effect	No effect	0	0	0	0	n/a	n/a	n/a	n/a
chr22_29115467_A_G	Val200Ala	Exon 5	No effect	No effect	No effect	No effect	0.28	0	0.04	0	-21 bp	n/a	6 bp	n/a
chr22_29115458_T_C	Asp203Gly	Exon 5	No effect	No effect	No effect	No effect	0.05	0	0	0	-12 bp	n/a	n/a	n/a
chr22_29108004_C_T	Gly229Ser	Exon 6	No effect	Introduction of weak acceptor splice site	Introduction of weak acceptor splice site	No effect	0	0	0.66	0	n/a	n/a	-2 bp	n/a
chr22_29108001_C_G	Ala230Pro	Exon 6	Introduction of weak acceptor splice site	No effect	No effect	No effect	0	0	0	0	n/a	n/a	n/a	n/a
chr22_29107974_C_T	Glu239Lys	Exon 6	No effect	No effect	No effect	No effect	0	0	0	0	n/a	n/a	n/a	n/a
chr22_29107962_A_G	Cys243Arg	Exon 6	No effect	No effect	No effect	No effect	0	0	0	0	n/a	n/a	n/a	n/a
chr22_29107949_G_T	Ala247Asp	Exon 6	No effect	No effect	No effect	No effect	0	0	0	0	n/a	n/a	n/a	n/a
chr22_29107943_T_C	Lys249Arg	Exon 6	No effect	No effect	No effect	No effect	0	0	0	0	n/a	n/a	n/a	n/a
chr22_29107938_T_A	Ile251Phe	Exon 6	No effect	No effect	No effect	No effect	0	0	0	0	n/a	n/a	n/a	n/a
chr22_29106023_C_T	Glu273Lys	Exon 7	No effect	No effect	No effect	No effect	0.03	0.04	0	0	24 bp	-29 bp	n/a	n/a
chr22_29095917_C_T	Gly306Glu	Exon 9	No effect	No effect	No effect	No effect	0	0	0	0	n/a	n/a	n/a	n/a
chr22_29095857_A_G	Leu326Pro	Exon 9	No effect	No effect	No effect	No effect	0	0	0	0	n/a	n/a	n/a	n/a
chr22_29092947_C_T	Arg346His	Exon 10	No effect	No effect	No effect	No effect	0.04	0	0	0	28 bp	n/a	n/a	n/a
chr22_29092945_C_T	Asp347Asn	Exon 10	No effect	No effect	No effect	No effect	0.07	0	0	0	30 bp	n/a	n/a	n/a
chr22_29092944_T_G	Asp347Ala	Exon 10	No effect	No effect	No effect	No effect	0.01	0	0	0	31 bp	n/a	n/a	n/a
chr22_29092931_C_A	Glu351Asp	Exon 10	No effect	No effect	No effect	No effect	0.04	0.01	0	0	44 bp	-42 bp	n/a	n/a
chr22_29091846_G_A	His371Tyr	Exon 11	No effect	No effect	No effect	No effect	0	0	0.02	0	n/a	n/a	-9 bp	n/a
chr22_29091801_C_G	Gly386Arg	Exon 11	No effect	No effect	No effect	No effect	0.01	0	0	0	36 bp	n/a	n/a	n/a
chr22_29091788_T_C	Tyr390Cys	Exon 11	No effect	No effect	No effect	No effect	0	0	0	0	n/a	n/a	n/a	n/a
chr22_29091788_T_G	Tyr390Ser	Exon 11	No effect	No effect	No effect	No effect	0	0	0	0	n/a	n/a	n/a	n/a
chr22_29091782_G_A	Ala392Val	Exon 11	No effect	No effect	No effect	No effect	0	0	0	0	n/a	n/a	n/a	n/a
chr22_29091732_C_T	Asp409Asn	Exon 11	No effect	No effect	No effect	No effect	0	0.01	0	0	n/a	-34 bp	n/a	n/a
chr22_29091721_A_T	Ser412Arg	Exon 11	No effect	No effect	No effect	No effect	0	0	0	0.01	n/a	n/a	n/a	-23 bp
chr22_29091716_C_T	Gly414Glu	Exon 11	No effect	No effect	No effect	No effect	0	0	0	0.01	n/a	n/a	n/a	-18 bp
chr22_29091213_G_C	Pro426Arg	Exon 12	No effect	No effect	No effect	No effect	0.12	0	0.04	0	-16 bp	n/a	11 bp	n/a
chr22_29091178_C_A	Asp438Tyr	Exon 12	No effect	No effect	No effect	No effect	0.05	0	0.02	0	19 bp	n/a	46 bp	n/a
chr22_29091154_T_C	Asn446Asp	Exon 12	No effect	No effect	No effect	No effect	0	0	0.01	0	n/a	n/a	43 bp	n/a
chr22_29091147_A_C	Ile448Ser	Exon 12	No effect	No effect	No effect	No effect	0	0	0	0	n/a	n/a	n/a	n/a
chr22_29090060_C_T	Arg474His	Exon 13	No effect	No effect	No effect	No effect	0.01	0.01	0	0	45 bp	-40 bp	n/a	n/a
chr22_29090060_C_A	Arg474Leu	Exon 13	No effect	No effect	No effect	No effect	0.01	0.01	0	0	45 bp	-40 bp	n/a	n/a
chr22_29090043_C_T	Ala480Thr	Exon 13	No effect	No effect	No effect	No effect	0	0.01	0	0	n/a	-23 bp	n/a	n/a
chr22_29090028_A_C	Trp485Gly	Exon 13	No effect	No effect	No effect	No effect	0	0.01	0	0	n/a	-8 bp	n/a	n/a
chr22_29085140_G_A	Pro509Ser	Exon 14	No effect	No effect	No effect	No effect	0	0	0	0.07	n/a	n/a	n/a	-5 bp
chr22_29083956_G_A	Arg521Trp	Exon 15	No effect	No effect	No effect	No effect	0.01	0	0	0	18 bp	n/a	n/a	n/a
