# Supplementary material for: Functional Analysis Identifies Damaging CHEK2 Missense Variants Associated with Increased Cancer Risk
Source: Oxford University Press journal article supplement (doi:10.1158/0008-5472.can-21-1845), 2021-12-13
Supplement: can-21-1845_supplementary_table_s3_supps3.xlsx [file can-21-1845_supplementary_table_s3_supps3.xlsx]

## Sheet: Sheet1
Supplementary Table S3
Complete list of human CHEK2 variants analyzed in this study. Nucleotide numbering reflects Human Genome Variation Society (HGVS) nomenclature where cDNA numbering +1 corresponds to the A of the ATG translation initiation codon in the reference sequence (CHEK2 NM_007194.4). The initiation codon is codon 1. Both forward and reverse SDM primes are shown for each CHEK2 variant.
Nt. change	Aa change	Forward SDM primer	Reverse SDM primer
c.49G>T	p.A17S	5'-agtctcatggcagcagttcctgttcacagcc-3'	5'-ggctgtgaacaggaactgctgccatgagact-3'
c.162C>T	p.H54=	5'-ctccagccagtcctctcattccagctctg-3'	5'-cagagctggaatgagaggactggctggag-3'
c.190G>A	p.E64K	5'-tctgggacactgagctccttaaagacagtgtcc-3'	5'-ggacactgtctttaaggagctcagtgtcccaga-3'
c.277delT	p.W93Gfs	5'-tacccctgcccccgggctcgattatg-3'	5'-cataatcgagcccgggggcaggggta-3'
c.349A>G	p.R117G	5'-acaactactggtttgggggggacaaaagctgtgaa-3'	5'-ttcacagcttttgtcccccccaaaccagtagttgt-3'
c.374T>C	p.F125S	5'-caaaagctgtgaatattgctctgatgaaccactgctg-3'	5'-cagcagtggttcatcagagcaatattcacagcttttg-3'
c.405delA	p.K135Nfs	5'-gaaccactgctgaaaagaacagataataccgaacatacag-3'	5'-ctgtatgttcggtattatctgttcttttcagcagtggttc-3'
c.411A>T	p.R137=	5'-ctgaaaagaacagataaataccgtacatacagcaagaaacactttcg-3'	5'-cgaaagtgtttcttgctgtatgtacggtatttatctgttcttttcag-3'
c.419G>A	p.S140N	5'-aacagataaataccgaacatacaacaagaaacactttcggattttca-3'	5'-tgaaaatccgaaagtgtttcttgttgtatgttcggtatttatctgtt-3'
c.422A>C	p.K141T	5'-gataaataccgaacatacagcacgaaacactttcggattttcagg-3'	5'-cctgaaaatccgaaagtgtttcgtgctgtatgttcggtatttatc-3'
c.433C>T	p.R145W	5'-ccgaacatacagcaagaaacacttttggattttcaggga-3'	5'-tccctgaaaatccaaaagtgtttcttgctgtatgttcgg-3'
c.470T>C	p.I157T	5'-gggaagtgggtcctaaaaactcttacactgcatacatagaag-3'	5'-cttctatgtatgcagtgtaagagtttttaggacccacttccc-3'
c.470T>G	p.I157S	5'-gggaagtgggtcctaaaaactcttacagtgcatacatagaag-3'	5'-cttctatgtatgcactgtaagagtttttaggacccacttccc-3'
c.479T>C	p.I160T	5'-tcctaaaaactcttacattgcatacacagaagatcacagtggc-3'	5'-gccactgtgatcttctgtgtatgcaatgtaagagtttttagga-3'
c.485A>G	p.D162G	5'-cattgcatacatagaaggtcacagtggcaatggaac-3'	5'-gttccattgccactgtgaccttctatgtatgcaatg-3'
c.499G>A	p.G167R	5'-tgcatacatagaagatcacagtggcaatagaacctttgtaaataca-3'	5'-tgtatttacaaaggttctattgccactgtgatcttctatgtatgca-3'
c.507delT	p.F169Lfs	5'-acagtggcaatggaaccttgtaaatacagagcttgtag-3'	5'-ctacaagctctgtatttacaaggttccattgccactgt-3'
c.507T>G	p.F169L	5'-acagtggcaatggaaccttggtaaatacagagcttgtag-3'	5'-ctacaagctctgtatttaccaaggttccattgccactgt-3'
c.538C>T	p.R180C	5'-cagagcttgtagggaaaggaaaatgccgtcctttga-3'	5'-tcaaaggacggcattttcctttccctacaagctctg-3'
c.542G>A	p.R181H	5'-tgtagggaaaggaaaacgccatcctttgaataacaattctg-3'	5'-cagaattgttattcaaaggatggcgttttcctttccctaca-3'
c.556A>C	p.N186H	5'-acgccgtcctttgaataaccattctgaaattgcactgtc-3'	5'-gacagtgcaatttcagaatggttattcaaaggacggcgt-3'
c.599T>C	p.V200A	5'-cactaagcagaaataaagtttttgccttttttgatctgactgtagatga-3'	5'-tcatctacagtcagatcaaaaaaggcaaaaactttatttctgcttagtg-3'
c.608A>G	p.D203G	5'-gaaataaagtttttgtcttttttggtctgactgtagatgatcagtcag-3'	5'-ctgactgatcatctacagtcagaccaaaaaagacaaaaactttatttc-3'
c.685G>A	p.G229S	5'-caaaaactcttggaagtagtgcctgtggagaggta-3'	5'-tacctctccacaggcactacttccaagagtttttg-3'
c.688G>C	p.A230P	5'-aaaactcttggaagtggtccctgtggagaggtaaa-3'	5'-tttacctctccacagggaccacttccaagagtttt-3'
c.715G>A	p.E239K	5'-gagaggtaaagctggctttcaagaggaaaacatgtaagaaa-3'	5'-tttcttacatgttttcctcttgaaagccagctttacctctc-3'
c.727T>C	p.C243R	5'-tggctttcgagaggaaaacacgtaagaaagtagccataaag-3'	5'-ctttatggctactttcttacgtgttttcctctcgaaagcca-3'
c.740C>A	p.A247D	5'-gaggaaaacatgtaagaaagtagacataaagatcatcagcaaaagga-3'	5'-tccttttgctgatgatctttatgtctactttcttacatgttttcctc-3'
c.746A>G	p.K249R	5'-aacatgtaagaaagtagccataaggatcatcagcaaaaggaagttt-3'	5'-aaacttccttttgctgatgatccttatggctactttcttacatgtt-3'
c.751A>T	p.I251F	5'-gtaagaaagtagccataaagatcttcagcaaaaggaagtttgctatt-3'	5'-aatagcaaacttccttttgctgaagatctttatggctactttcttac-3'
c.757A>T	p.K253X	5'-gtagccataaagatcatcagctaaaggaagtttgctattggtt-3'	5'-aaccaatagcaaacttcctttagctgatgatctttatggctac-3'
c.817G>A	p.E273K	5'-gacccagctctcaatgttgaaacaaaaatagaaattttgaaaaagctaa-3'	5'-ttagctttttcaaaatttctatttttgtttcaacattgagagctgggtc-3'
c.858C>A	p.I286=	5'-aattttgaaaaagctaaatcatccttgcatcataaagattaaaaacttttttgatgca-3'	5'-tgcatcaaaaaagtttttaatctttatgatgcaaggatgatttagctttttcaaaatt-3'
c.917G>A	p.G306E	5'-gttttggaattgatggaagagggagagctgtttgacaaa-3'	5'-tttgtcaaacagctctccctcttccatcaattccaaaac-3'
c.977T>C	p.L326P	5'-aaagaagctacctgcaagccctatttttaccagatgctc-3'	5'-gagcatctggtaaaaatagggcttgcaggtagcttcttt-3'
c.1037G>A	p.R346H	5'-catgaaaacggtattatacaccatgacttaaagccagagaatgtt-3'	5'-aacattctctggctttaagtcatggtgtataataccgttttcatg-3'
c.1039G>A	p.D347N	5'-ccttcatgaaaacggtattatacaccgtaacttaaagccagaga-3'	5'-tctctggctttaagttacggtgtataataccgttttcatgaagg-3'
c.1040A>C	p.D347A	5'-gaaaacggtattatacaccgtggcttaaagccagagaatgtttta-3'	5'-taaaacattctctggctttaagccacggtgtataataccgttttc-3'
c.1053G>T	p.E351D	5'-caccgtgacttaaagccagataatgttttactgtcatctca-3'	5'-tgagatgacagtaaaacattatctggctttaagtcacggtg-3'
c.1100delC	p.T367Mfs	5'-caagaagaggactgtcttataaagattatgattttgggcactc-3'	5'-gagtgcccaaaatcataatctttataagacagtcctcttcttg-3'
c.1101T>A	p.T367=	5'-gaggactgtcttataaagattacagattttgggcactccaag-3'	5'-cttggagtgcccaaaatctgtaatctttataagacagtcctc-3'
c.1111C>T	p.H371Y	5'-tataaagattactgattttgggtactccaagattttgggagagac-3'	5'-gtctctcccaaaatcttggagtacccaaaatcagtaatctttata-3'
c.1156G>C	p.G386R	5'-tctctcatgagaaccttatgtcgaacccccacctac-3'	5'-gtaggtgggggttcgacataaggttctcatgagaga-3'
c.1169A>G	p.Y390C	5'-ggaacccccacctgcttggcgcctgaa-3'	5'-ttcaggcgccaagcaggtgggggttcc-3'
c.1169A>C	p.Y390S	5'-ggaacccccacctccttggcgcctgaa-3'	5'-ttcaggcgccaaggaggtgggggttcc-3'
c.1175C>T	p.A392V	5'-cccccacctacttggtgcctgaagttcttgt-3'	5'-acaagaacttcaggcaccaagtaggtggggg-3'
c.1225G>A	p.D409N	5'-ggtataaccgtgctgtgaactgctggagtttagga-3'	5'-tcctaaactccagcagttcacagcacggttatacc-3'
c.1236T>A	p.S412R	5'-gtgctgtggactgctggagattaggagttattcttttta-3'	5'-taaaaagaataactcctaatctccagcagtccacagcac-3'
c.1241G>A	p.G414E	5'-tgtggactgctggagtttagaagttattctttttatctgcc-3'	5'-ggcagataaaaagaataacttctaaactccagcagtccaca-3'
c.1263delT	p.S422Vfs	5'-ttaggagttattctttttatctgcctagtgggtatccacc-3'	5'-ggtggatacccactaggcagataaaaagaataactcctaa-3'
c.1277C>G	p.P426R	5'-ccttagtgggtatccacgtttctctgagcatagga-3'	5'-tcctatgctcagagaaacgtggatacccactaagg-3'
c.1305A>T	p.S435=	5'-cataggactcaagtgtctctgaaggatcagatcac-3'	5'-gtgatctgatccttcagagacacttgagtcctatg-3'
c.1312G>T	p.D438Y	5'-ctcaagtgtcactgaagtatcagatcaccagtgga-3'	5'-tccactggtgatctgatacttcagtgacacttgag-3'
c.1336A>G	p.N446D	5'-gatcaccagtggaaaatacgacttcattcctgaagtctg-3'	5'-cagacttcaggaatgaagtcgtattttccactggtgatc-3'
c.1343T>G	p.I448S	5'-atcaccagtggaaaatacaacttcagtcctgaagtctgg-3'	5'-ccagacttcaggactgaagttgtattttccactggtgat-3'
c.1421G>A	p.R474H	5'-tagtggatccaaaggcacattttacgacagaagaagc-3'	5'-gcttcttctgtcgtaaaatgtgcctttggatccacta-3'
c.1421G>T	p.R474L	5'-tagtggatccaaaggcactttttacgacagaagaagc-3'	5'-gcttcttctgtcgtaaaaagtgcctttggatccacta-3'
c.1422T>A	p.R474=	5'-gtggatccaaaggcacgatttacgacagaagaagc-3"	5'-gcttcttctgtcgtaaatcgtgcctttggatccac-3'
c.1438G>A	p.A480T	5'-aggcacgttttacgacagaagaaaccttaagacaccc-3'	5'-gggtgtcttaaggtttcttctgtcgtaaaacgtgcct-3'
c.1453T>G	p.W485G	5'-gccttaagacacccggggcttcaggatgaag-3'	5'-cttcatcctgaagccccgggtgtcttaaggc-3'
c.1525C>T	p.P509S	5'-aaatgaatccacagctctatcccaggttctagccc-3'	5'-gggctagaacctgggatagagctgtggattcattt-3'
c.1555C>T	p.R519X	5'-ccagccttctactagttgaaagcggcccc-3'	5'-ggggccgctttcaactagtagaaggctgg-3'
c.1561C>T	p.R521W	5'-gccttctactagtcgaaagtggccccgtgaag-3'	5'-cttcacggggccactttcgactagtagaaggc-3'
